# Supplementary material
Source: PubMed Central journal article supplement (PMC1810062)
Supplement: 15503990supp.pdf [file 15503990supp.pdf]

These are electronic appendices to the Biology Letter by Willmott & Mallet 2004 Correlations between adult mimicry and larval host plants in ithomiine butterflies *Proc. R. Soc. Lond. B (Suppl.)* **271**, S266–S269. (DOI 10.1098/rsbl.2004.0184.)

Electronic appendices are refereed with the text. However, no attempt has been made to impose a uniform editorial style on the electronic appendices.

Electronic Appendix A Hostplant records and mimicry classification for five ithomiine communities.

| Tribe                                               | Genus      | Species     | Subspecies   | Male mimicry ring | Female mimicry ring | Plant genus | Plant species | Delete |
|-----------------------------------------------------|------------|-------------|--------------|-------------------|---------------------|-------------|---------------|--------|
| <b>ECUADOR NORTH MONTANE (Willmott, this study)</b> |            |             |              |                   |                     |             |               |        |
| Dircennini                                          | Dircenna   | adina       | lorica       | OCNA              | OCNA                | Solanum     | asperum       | no     |
| Dircennini                                          | Dircenna   | adina       | lorica       | OCNA              | OCNA                | Solanum     | ovalifolium   | no     |
| Dircennini                                          | Dircenna   | adina       | lorica       | OCNA              | OCNA                | Solanum     | sect. Torva1  | no     |
| Dircennini                                          | Dircenna   | adina       | lorica       | OCNA              | OCNA                | Solanum     | sect. Torva3  | no     |
| Dircennini                                          | Dircenna   | paradoxa    | praestigiosa | PANTHYALE         | PANTHYALE           | Dunalia     | solanacea     | no     |
| Dircennini                                          | Dircenna   | paradoxa    | praestigiosa | PANTHYALE         | PANTHYALE           | Solanum     | sect. Torva1  | no     |
| Dircennini                                          | Dircenna   | paradoxa    | praestigiosa | PANTHYALE         | PANTHYALE           | Solanum     | sect. Torva2  | no     |
| Dircennini                                          | Dircenna   | paradoxa    | praestigiosa | PANTHYALE         | PANTHYALE           | Solanum     | sect. Torva3  | no     |
| Dircennini                                          | Episcada   | mira        |              | LIBETHRIS         | AGNOSIA             | Solanum     | aphyodendron  | no     |
| Dircennini                                          | Hyalenna   | sulmona     | lobusa       | PANTHYALE         | PANTHYALE           | Solanum     | lepidotum     | no     |
| Dircennini                                          | Pteronymia | alida       | ssp          | HEWITSONI         | HEWITSONI           | Solanum     | nutans        | no     |
| Dircennini                                          | Pteronymia | alissa      | andreas      | AGNOSIA           | AGNOSIA             | Solanum     | abituense     | no     |
| Dircennini                                          | Pteronymia | alissa      | andreas      | AGNOSIA           | AGNOSIA             | Solanum     | aphyodendron  | no     |
| Dircennini                                          | Pteronymia | artena      | afrania      | AGNOSIA           | AGNOSIA             | Lycianthes  | multiflora    | no     |
| Dircennini                                          | Pteronymia | sp          |              | TICIDA-M          | HEWITSONI           | Solanum     | nudum         | no     |
| Dircennini                                          | Pteronymia | dispaena    | inania       | HEWITSONI         | HEWITSONI           | Solanum     | cajanumense   | no     |
| Dircennini                                          | Pteronymia | dispaena    | inania       | HEWITSONI         | HEWITSONI           | Solanum     | calidum       | no     |
| Dircennini                                          | Pteronymia | oneida      | oneida       | HEWITSONI         | HEWITSONI           | Solanum     | deflexiflorum | no     |
| Dircennini                                          | Pteronymia | serrata     | ssp          | HEWITSONI         | HEWITSONI           | Solanum     | deflexiflorum | no     |
| Dircennini                                          | Pteronymia | serrata     | ssp          | HEWITSONI         | HEWITSONI           | Solanum     | nudum         | yes    |
| Dircennini                                          | Pteronymia | serrata     | ssp          | HEWITSONI         | HEWITSONI           | Solanum     | nutans        | no     |
| Godyridini                                          | Godyris    | duillia     |              | DUILLIA           | DUILLIA             | Cestrum     | microcalyx    | no     |
| Godyridini                                          | Godyris    | panthyale   | panthyale    | PANTHYALE         | PANTHYALE           | Cestrum     | sp1           | no     |
| Godyridini                                          | Greta      | alphisiboea |              | DUILLIA           | DUILLIA             | Cestrum     | microcalyx    | no     |
| Godyridini                                          | Greta      | andromica   | andania      | AGNOSIA           | AGNOSIA             | Cestrum     | microcalyx    | no     |
| Godyridini                                          | Greta      | enigma      | ssp          | PANTHYALE         | PANTHYALE           | Cestrum     | megalophyllum | no     |
| Godyridini                                          | Greta      | enigma      | ssp          | PANTHYALE         | PANTHYALE           | Cestrum     | sp1           | no     |
| Godyridini                                          | Greta      | hermana     | joiceyi      | JOICEYI           | JOICEYI             | Cestrum     | megalophyllum | no     |
| Godyridini                                          | Greta      | hermana     | joiceyi      | JOICEYI           | JOICEYI             | Cestrum     | sp2           | no     |
| Godyridini                                          | Greta      | lydia       |              | HEWITSONI         | HEWITSONI           | Cestrum     | megalophyllum | no     |
| Godyridini                                          | Greta      | ortygia     | ortygia      | PANTHYALE         | PANTHYALE           | Cestrum     | megalophyllum | no     |
| Napeogenini                                         | Hyaliris   | ocna        | ssp          | OCNA              | OCNA                | Solanum     | asperum       | no     |
| Napeogenini                                         | Hyaliris   | ocna        | ssp          | OCNA              | OCNA                | Solanum     | sect. Torva3  | no     |
| Napeogenini                                         | Napeogenes | apulvia     | ssp          | OCNA              | OCNA                | Lycianthes  | multiflora    | no     |
| Oleriini                                            | Oleria     | fasciata    | fasciata     | SUSIANA           | SUSIANA             | Solanum     | anceps        | no     |
| Oleriini                                            | Oleria     | makrena     | makrenita    | AGNOSIA           | AGNOSIA             | Lycianthes  | multiflora    | no     |
| Oleriini                                            | Oleria     | santineza   | ssp          | BANJANA-M         | BANJANA-M           | Solanum     | abituense     | no     |
| <b>ECUADOR SOUTH MONTANE (Willmott, this study)</b> |            |             |              |                   |                     |             |               |        |
| Dircennini                                          | Dircenna   | adina       | lorica       | MESTRA            | MESTRA              | Solanum     | sect. Torva2  | no     |
| Dircennini                                          | Dircenna   | paradoxa    | praestigiosa | PANTHYALE         | PANTHYALE           | Solanum     | hispidum      | no     |
| Dircennini                                          | Episcada   | apuleia     | apuleia      | APULEIA           | APULEIA             | Solanum     | aphyodendron  | no     |
| Dircennini                                          | Episcada   | apuleia     | apuleia      | APULEIA           | APULEIA             | Solanum     | aphyodendron  | no     |
| Dircennini                                          | Episcada   | apuleia     | apuleia      | APULEIA           | APULEIA             | Solanum     | sp2           | no     |
| Dircennini                                          | Episcada   | mira        |              | LIBETHRIS         | AGNOSIA             | Solanum     | aphyodendron  | no     |
| Dircennini                                          | Pteronymia | alida       | ssp          | APULEIA           | APULEIA             | Solanum     | nutans        | no     |
| Dircennini                                          | Pteronymia | alissa      | andreas      | AGNOSIA           | AGNOSIA             | Brugmansia  | candida       | no     |
| Dircennini                                          | Pteronymia | alissa      | andreas      | AGNOSIA           | AGNOSIA             | Solanum     | abituense     | no     |

Electronic Appendix A Cont. Hostplant records and mimicry classification for five ithomiine communities.

| Tribe                                               | Genus       | Species     | Subspecies  | Male mimicry ring | Female mimicry ring | Plant genus  | Plant species     | Delete |
|-----------------------------------------------------|-------------|-------------|-------------|-------------------|---------------------|--------------|-------------------|--------|
| <b>ECUADOR SOUTH MONTANE (Willmott, this study)</b> |             |             |             |                   |                     |              |                   |        |
| Dircennini                                          | Pteronymia  | ozia        | ozia        | OZIA              | MESTRA              | Solanum      | aphyodendron      | no     |
| Dircennini                                          | Pteronymia  | teresita    | thabena     | OZIA              | DUILLIA             | Solanum      | cajanumense       | no     |
| Dircennini                                          | Pteronymia  | ticida      | ticida      | TICIDA-M          | HEWITSONI           | Solanum      | abituense         | no     |
| Dircennini                                          | Pteronymia  | ticida      | ticida      | TICIDA-M          | HEWITSONI           | Solanum      | sp5               | no     |
| Dircennini                                          | Pteronymia  | zerlina     | ssp         | APULEIA           | APULEIA             | Solanum      | sp5               | no     |
| Dircennini                                          | Velamysta   | phengites   | phengites   | PANTHYALE         | PANTHYALE           | Cuatresia    | riparia           | no     |
| Godyridini                                          | Godyris     | duillia     |             | DUILLIA           | DUILLIA             | Cestrum      | microcalyx        | no     |
| Godyridini                                          | Godyris     | panthyale   | panthyale   | PANTHYALE         | PANTHYALE           | Cestrum      | sp1               | no     |
| Godyridini                                          | Greta       | andromica   | andania     | AGNOSIA           | AGNOSIA             | Solanum      | anceps            | no     |
| Godyridini                                          | Greta       | sp          |             | AGNOSIA           | AGNOSIA             | Cestrum      | microcalyx        | no     |
| Godyridini                                          | Greta       | depauperata | umbrosa     | LAUTA             | LAUTA               | Solanum      | sp1               | yes    |
| Godyridini                                          | Greta       | enigma      | ssp         | PANTHYALE         | PANTHYALE           | Cestrum      | sp1               | no     |
| Godyridini                                          | Greta       | theudelinda | zalmunna    | ZALMUNNA          | ZALMUNNA            | Solanum      | sp3               | no     |
| Ithomiini                                           | Ithomia     | avella      | epona       | TICIDA-M          | HEWITSONI           | Cuatresia    | riparia           | no     |
| Ithomiini                                           | Ithomia     | lagusa      | linda       | ANTEA             | ANTEA               | Cuatresia    | riparia           | no     |
| Ithomiini                                           | Ithomia     | salapia     | derasa      | DERASA            | DERASA              | Witheringia  | solanacea         | no     |
| Ithomiini                                           | Ithomia     | terra       |             | BANJANA-M         | BANJANA-M           | Cuatresia    | riparia           | no     |
| Melinieini                                          | Melinaea    | menophilus  | zaneka      | AMICA             | AMICA               | Markea       | sp                | no     |
| Oleriini                                            | Megoleria   | orestilla   | orestilla   | BANJANA-M         | BANJANA-M           | Gesneriaceae | unidentified      | no     |
| Tithoreini                                          | Patricia    | dercyllidas | dercyllidas | DERCYLLIDAS       | DERCYLLIDAS         | Capsicum     | lycianthoides     | no     |
| <b>ECUADOR LOWLAND (Drummond, 1976)</b>             |             |             |             |                   |                     |              |                   |        |
| Dircennini                                          | Ceratinia   | tutia       | poecila     | HERMIAS           | MAMERCUS            | Solanum      | antillarum        | No     |
| Dircennini                                          | Episcada    | sulphurea   | ssp         | SALAPIA           | SALAPIA             | Solanum      | sp. (7336)        | No     |
| Dircennini                                          | Pteronymia  | vestilla    | sparsa      | SALAPIA           | SALAPIA             | Solanum      | nr. nudum         | No     |
| Godyridini                                          | Godyris     | zavaleta    | matronalis  | SALAPIA           | SALAPIA             | Cestrum      | laevigatum        | No     |
| Godyridini                                          | Godyris     | zavaleta    | matronalis  | SALAPIA           | SALAPIA             | Cestrum      | sp. (7334)        | No     |
| Godyridini                                          | Heterosais  | giulia      | nephele     | AGNOSIA           | AGNOSIA             | Cestrum      | sp. (7324)        | No     |
| Godyridini                                          | Brevioleria | arzialia    | ssp         | AURELIANA         | AURELIANA           | Cestrum      | sp. (7353)        | No     |
| Godyridini                                          | Pseudoscada | timna       | ssp         | AGNOSIA           | AGNOSIA             | Cestrum      | sp. (7324)        | No     |
| Ithomiini                                           | Ithomia     | agnosia     | agnosia     | AGNOSIA           | AGNOSIA             | Physalis     | pubescens         | No     |
| Ithomiini                                           | Ithomia     | amarilla    |             | SALAPIA           | SALAPIA             | Cuatresia    | sp. (7327)        | No     |
| Ithomiini                                           | Ithomia     | salapia     | derasa      | DERASA            | DERASA              | Physalis     | angulata          | No     |
| Mechanitini                                         | Forbestra   | olivencia   | juntana     | HERMIAS           | HERMIAS             | Solanum      | anceps            | No     |
| Mechanitini                                         | Mechanitis  | lysimnia    | roqueensis  | HERMIAS           | HERMIAS             | Solanum      | macronotum        | No     |
| Mechanitini                                         | Mechanitis  | lysimnia    | roqueensis  | HERMIAS           | HERMIAS             | Solanum      | pectinatum        | No     |
| Mechanitini                                         | Mechanitis  | lysimnia    | roqueensis  | HERMIAS           | HERMIAS             | Solanum      | sp. (7334)        | No     |
| Mechanitini                                         | Mechanitis  | mazaeus     | mazaeus     | HERMIAS           | HERMIAS             | Solanum      | nr. lancaeifolium | No     |
| Mechanitini                                         | Mechanitis  | mazaeus     | mazaeus     | HERMIAS           | HERMIAS             | Solanum      | sp. (7326)        | No     |
| Mechanitini                                         | Mechanitis  | mazaeus     | mazaeus     | HERMIAS           | HERMIAS             | Solanum      | sp. (7333)        | No     |
| Mechanitini                                         | Mechanitis  | messenoides | deceptus    | MOTHONE           | MOTHONE             | Solanum      | pectinatum        | No     |
| Mechanitini                                         | Mechanitis  | messenoides | deceptus    | MOTHONE           | MOTHONE             | Solanum      | quitoense         | No     |
| Mechanitini                                         | Mechanitis  | messenoides | deceptus    | MOTHONE           | MOTHONE             | Solanum      | sessiliflorum     | No     |
| Mechanitini                                         | Mechanitis  | polymnia    | ssp         | HERMIAS           | HERMIAS             | Cyphomandra  | hartwegii         | No     |
| Mechanitini                                         | Mechanitis  | polymnia    | ssp         | HERMIAS           | HERMIAS             | Lycopersicon | esculentum        | No     |
| Mechanitini                                         | Mechanitis  | polymnia    | ssp         | HERMIAS           | HERMIAS             | Solanum      | quitoense         | No     |
| Mechanitini                                         | Mechanitis  | polymnia    | ssp         | HERMIAS           | HERMIAS             | Solanum      | sessiliflorum     | No     |

Electronic Appendix A Cont. Hostplant records and mimicry classification for five ithomiine communities.

| Tribe                                   | Genus       | Species    | Subspecies   | Male mimicry ring | Female mimicry ring | Plant genus | Plant species      | Delete |
|-----------------------------------------|-------------|------------|--------------|-------------------|---------------------|-------------|--------------------|--------|
| <b>ECUADOR LOWLAND (Drummond, 1976)</b> |             |            |              |                   |                     |             |                    |        |
| Mechanitini                             | Mechanitis  | polymnia   | ssp          | HERMIAS           | HERMIAS             | Solanum     | sp. (7334)         | Yes    |
| Mechanitini                             | Methona     | confusa    | psamathe     | CONFUSA           | CONFUSA             | Brunfelsia  | pauciflora         | No     |
| Mechanitini                             | Methona     | confusa    | psamathe     | CONFUSA           | CONFUSA             | Brunfelsia  | sp. (7330)         | No     |
| Mechanitini                             | Scada       | zibia      | quotidiana   | DERASA            | DERASA              | Solanum     | sp. (7331)         | No     |
| Mechanitini                             | Scada       | zibia      | batesi       | SALAPIA           | SALAPIA             | Solanum     | sp. (7331)         | No     |
| Mechanitini                             | Thyridia    | psidii     | ino          | CONFUSA           | CONFUSA             | Cyphomandra | hartwegii          | No     |
| Napeogenini                             | Hypothyris  | euclea     | intermedia   | HERMIAS           | HERMIAS             | Solanum     | bicolor            | No     |
| Napeogenini                             | Hypothyris  | fluonia    | berna        | HERMIAS           | HERMIAS             | Solanum     | sp. (7311)         | No     |
| Napeogenini                             | Hypothyris  | semifulva  | satura       | HERMIAS           | HERMIAS             | Solanum     | schlechtendalianum | No     |
| Napeogenini                             | Napeogenes  | inachia    | pozziana     | SALAPIA           | SALAPIA             | Lycianthes  | howardiana         | No     |
| Napeogenini                             | Napeogenes  | syphis     | corena       | AURELIANA         | AURELIANA           | Lycianthes  | sp. (7325)         | No     |
| Oleriini                                | Oleria      | onega      | ssp          | LERIDA            | LERIDA              | Lycianthes  | maxonii            | No     |
| Oleriini                                | Oleria      | onega      | ssp          | LERIDA            | LERIDA              | Solanum     | evolulifolium      | No     |
| Oleriini                                | Oleria      | onega      | ssp          | LERIDA            | LERIDA              | Solanum     | sp. (7310)         | No     |
| Oleriini                                | Oleria      | onega      | ssp          | LERIDA            | LERIDA              | Solanum     | sp. (7319)         | No     |
| <b>COSTA RICA (Haber, 1978, 2003)</b>   |             |            |              |                   |                     |             |                    |        |
| Dircennini                              | Callithomia | hezia      | hezia        | HEZIA             | HEZIA               | Lycianthes  | sanctaeclarae      | no     |
| Dircennini                              | Ceratinia   | tutia      | dorilla      | SCYLAX            | SCYLAX              | Solanum     | aphyodendron       | no     |
| Dircennini                              | Dircenna    | dero       | ssp          | DILUCIDA          | SCYLAX              | Solanum     | chrysotrichum      | no     |
| Dircennini                              | Dircenna    | dero       | ssp          | DILUCIDA          | SCYLAX              | Solanum     | rudepannum         | no     |
| Dircennini                              | Dircenna    | jemina     | chiriquensis | DILUCIDA          | DILUCIDA            | Solanum     | siparunoides       | no     |
| Dircennini                              | Dircenna    | klugii     | klugii       | DILUCIDA          | DILUCIDA            | Solanum     | chrysotrichum      | yes-m  |
| Dircennini                              | Dircenna    | klugii     | klugii       | DILUCIDA          | DILUCIDA            | Solanum     | rudepannum         | yes-m  |
| Dircennini                              | Dircenna    | klugii     | klugii       | DILUCIDA          | DILUCIDA            | Solanum     | umbellatum         | no     |
| Dircennini                              | Dircenna    | olyras     | relata       | INSIGNIS          | SCYLAX              | Solanum     | chrysotrichum      | yes-f  |
| Dircennini                              | Dircenna    | olyras     | relata       | INSIGNIS          | SCYLAX              | Solanum     | rudepannum         | yes-f  |
| Dircennini                              | Dircenna    | olyras     | relata       | INSIGNIS          | SCYLAX              | Solanum     | umbellatum         | no     |
| Dircennini                              | Episcada    | salvinia   | opleri       | SIMPLEX           | SIMPLEX             | Solanum     | aphyodendron       | no     |
| Dircennini                              | Pteronymia  | aletta     | agalla       | SCYLAX            | SCYLAX              | Solanum     | rovirosanum        | no     |
| Dircennini                              | Pteronymia  | artena     | ssp          | SIMPLEX           | SIMPLEX             | Lycianthes  | escuitlensis       | no     |
| Dircennini                              | Pteronymia  | artena     | ssp          | SIMPLEX           | SIMPLEX             | Lycianthes  | multiflora         | no     |
| Dircennini                              | Pteronymia  | artena     | ssp          | SIMPLEX           | SIMPLEX             | Lycianthes  | synanthera         | no     |
| Dircennini                              | Pteronymia  | fulvimargo |              | DILUCIDA          | DILUCIDA            | Lycianthes  | synanthera         | no     |
| Dircennini                              | Pteronymia  | latilla    | fulvescens   | DILUCIDA          | DILUCIDA            | Solanum     | brenesii           | no     |
| Dircennini                              | Pteronymia  | latilla    | fulvescens   | DILUCIDA          | DILUCIDA            | Solanum     | tuerckheimii       | no     |
| Dircennini                              | Pteronymia  | lonera     |              | DECUMANA          | DECUMANA            | Solanum     | circinatum         | no     |
| Dircennini                              | Pteronymia  | parva      |              | PATILLA           | PATILLA             | Solanum     | arboreum           | no     |
| Dircennini                              | Pteronymia  | picta      | notilla      | DILUCIDA          | SCYLAX              | Solanum     | tuerckheimii       | no     |
| Dircennini                              | Pteronymia  | simplex    | simplex      | SIMPLEX           | SIMPLEX             | Solanum     | aphyodendron       | no     |
| Dircennini                              | Pteronymia  | simplex    | simplex      | SIMPLEX           | SIMPLEX             | Solanum     | brenesii           | no     |
| Dircennini                              | Pteronymia  | simplex    | simplex      | SIMPLEX           | SIMPLEX             | Solanum     | pastillum          | no     |
| Dircennini                              | Pteronymia  | simplex    | simplex      | SIMPLEX           | SIMPLEX             | Solanum     | pertenuae          | no     |
| Dircennini                              | Pteronymia  | simplex    | simplex      | SIMPLEX           | SIMPLEX             | Solanum     | ramonense          | no     |
| Dircennini                              | Pteronymia  | simplex    | simplex      | SIMPLEX           | SIMPLEX             | Solanum     | rovirosanum        | no     |
| Dircennini                              | Pteronymia  | simplex    | simplex      | SIMPLEX           | SIMPLEX             | Solanum     | tuerckheimii       | no     |
| Godyridini                              | Godyris     | nero       |              | SIMPLEX           | SIMPLEX             | Cestrum     | racemosum          | no     |
| Godyridini                              | Godyris     | zavaleta   | caesiopicta  | INSIGNIS          | SCYLAX              | Cestrum     | nocturnum          | no     |

Electronic Appendix A Cont. Hostplant records and mimicry classification for five ithomiine communities.

| Tribe                                 | Genus      | Species   | Subspecies  | Male mimicry ring | Female mimicry ring | Plant genus | Plant species      | Delete |
|---------------------------------------|------------|-----------|-------------|-------------------|---------------------|-------------|--------------------|--------|
| <b>COSTA RICA (Haber, 1978, 2003)</b> |            |           |             |                   |                     |             |                    |        |
| Godyridini                            | Greta      | morgane   | oto         | PATILLA           | PATILLA             | Cestrum     | lanatum            | no     |
| Godyridini                            | Greta      | morgane   | oto         | PATILLA           | PATILLA             | Cestrum     | racemosum          | no     |
| Godyridini                            | Greta      | morgane   | oto         | PATILLA           | PATILLA             | Cestrum     | sp. "San Luis"     | no     |
| Godyridini                            | Greta      | annette   | championi   | SIMPLEX           | SIMPLEX             | Cestrum     | fragile            | no     |
| Godyridini                            | Greta      | annette   | championi   | SIMPLEX           | SIMPLEX             | Cestrum     | irazuense          | no     |
| Godyridini                            | Greta      | annette   | championi   | SIMPLEX           | SIMPLEX             | Cestrum     | lanatum            | no     |
| Godyridini                            | Greta      | annette   | championi   | SIMPLEX           | SIMPLEX             | Cestrum     | megalophyllum      | no     |
| Godyridini                            | Greta      | annette   | championi   | SIMPLEX           | SIMPLEX             | Cestrum     | rugulosum          | no     |
| Godyridini                            | Greta      | annette   | championi   | SIMPLEX           | SIMPLEX             | Cestrum     | sp. "Button Berry" | no     |
| Godyridini                            | Greta      | polissena | umbrana     | SIMPLEX           | SIMPLEX             | Cestrum     | fragile            | no     |
| Godyridini                            | Greta      | polissena | umbrana     | SIMPLEX           | SIMPLEX             | Cestrum     | irazuense          | no     |
| Godyridini                            | Greta      | polissena | umbrana     | SIMPLEX           | SIMPLEX             | Cestrum     | megalophyllum      | no     |
| Godyridini                            | Greta      | polissena | umbrana     | SIMPLEX           | SIMPLEX             | Cestrum     | panamense          | no     |
| Godyridini                            | Greta      | polissena | umbrana     | SIMPLEX           | SIMPLEX             | Cestrum     | rugulosum          | no     |
| Godyridini                            | Greta      | polissena | umbrana     | SIMPLEX           | SIMPLEX             | Cestrum     | sp. "Button Berry" | no     |
| Godyridini                            | Hypoleria  | lavinia   | cassotis    | PATILLA           | PATILLA             | Cestrum     | megalophyllum      | no     |
| Ithomiini                             | Ithomia    | celebia   | plaginota   | SCYLAX            | SCYLAX              | Cuatresia   | riparia            | no     |
| Ithomiini                             | Ithomia    | diasia    | hippocrenis | PATILLA           | PATILLA             | Witheringia | asterotricha       | no     |
| Ithomiini                             | Ithomia    | diasia    | hippocrenis | PATILLA           | PATILLA             | Witheringia | meiantha           | no     |
| Ithomiini                             | Ithomia    | heraldica |             | SCYLAX            | SCYLAX              | Acnistus    | arborescens        | no     |
| Ithomiini                             | Ithomia    | heraldica |             | SCYLAX            | SCYLAX              | Cuatresia   | riparia            | yes    |
| Ithomiini                             | Ithomia    | heraldica |             | SCYLAX            | SCYLAX              | Lycianthes  | amatitlanensis?    | no     |
| Ithomiini                             | Ithomia    | heraldica |             | SCYLAX            | SCYLAX              | Witheringia | morii              | no     |
| Ithomiini                             | Ithomia    | patilla   |             | PATILLA           | PATILLA             | Brachistus  | stramoniifolius    | no     |
| Ithomiini                             | Ithomia    | patilla   |             | PATILLA           | PATILLA             | Lycianthes  | multiflora         | no     |
| Ithomiini                             | Ithomia    | patilla   |             | PATILLA           | PATILLA             | Witheringia | meiantha           | yes    |
| Ithomiini                             | Ithomia    | patilla   |             | PATILLA           | PATILLA             | Witheringia | solanacea          | no     |
| Ithomiini                             | Ithomia    | patilla   |             | PATILLA           | PATILLA             | Witheringia | sp.                | no     |
| Ithomiini                             | Ithomia    | xenos     | xenos       | DILUCIDA          | DILUCIDA            | Acnistus    | arborescens        | no     |
| Ithomiini                             | Ithomia    | xenos     | xenos       | DILUCIDA          | DILUCIDA            | Cuatresia   | riparia            | no     |
| Ithomiini                             | Ithomia    | xenos     | xenos       | DILUCIDA          | DILUCIDA            | Witheringia | cuneata            | no     |
| Mechanitini                           | Mechanitis | lysinnia  | utemaia     | IMITATA           | IMITATA             | Solanum     | rugosum            | no     |
| Mechanitini                           | Mechanitis | lysinnia  | utemaia     | IMITATA           | IMITATA             | Solanum     | siparunoides       | no     |
| Mechanitini                           | Mechanitis | menapis   | saturata    | IMITATA           | IMITATA             | Solanum     | acerifolium        | no     |
| Mechanitini                           | Mechanitis | menapis   | saturata    | IMITATA           | IMITATA             | Solanum     | chrysotrichum      | no     |
| Mechanitini                           | Mechanitis | menapis   | saturata    | IMITATA           | IMITATA             | Solanum     | quitoense          | no     |
| Mechanitini                           | Mechanitis | menapis   | saturata    | IMITATA           | IMITATA             | Solanum     | siparunoides       | yes    |
| Mechanitini                           | Mechanitis | polymnia  | isthmia     | IMITATA           | IMITATA             | Jaltomata   | repandidentata     | no     |
| Mechanitini                           | Mechanitis | polymnia  | isthmia     | IMITATA           | IMITATA             | Solanum     | chrysotrichum      | yes    |
| Mechanitini                           | Mechanitis | polymnia  | isthmia     | IMITATA           | IMITATA             | Solanum     | hartwegii          | no     |
| Mechanitini                           | Mechanitis | polymnia  | isthmia     | IMITATA           | IMITATA             | Solanum     | jamaicense         | no     |
| Mechanitini                           | Mechanitis | polymnia  | isthmia     | IMITATA           | IMITATA             | Solanum     | lanceifolium       | no     |
| Mechanitini                           | Mechanitis | polymnia  | isthmia     | IMITATA           | IMITATA             | Solanum     | rudepannum         | no     |
| Mechanitini                           | Mechanitis | polymnia  | isthmia     | IMITATA           | IMITATA             | Solanum     | rugosum            | yes    |
| Mechanitini                           | Mechanitis | polymnia  | isthmia     | IMITATA           | IMITATA             | Solanum     | siparunoides       | yes    |
| Mechanitini                           | Scada      | zibia     | xanthina    | AGNA              | AGNA                | Solanum     | arboereum          | no     |
| Mechanitini                           | Scada      | zibia     | xanthina    | AGNA              | AGNA                | Solanum     | siparunoides       | no     |
| Mechanitini                           | Thyridia   | psidii    | melantho    | SCYLAX            | SCYLAX              | Solanum     | circinatum         | no     |

Electronic Appendix A Cont. Hostplant records and mimicry classification for five ithomiine communities.

| Tribe                                  | Genus       | Species    | Subspecies  | Male mimicry ring | Female mimicry ring | Plant genus     | Plant species      | Delete |
|----------------------------------------|-------------|------------|-------------|-------------------|---------------------|-----------------|--------------------|--------|
| <b>COSTA RICA (Haber, 1978, 2003)</b>  |             |            |             |                   |                     |                 |                    |        |
| Melinieini                             | Melinaea    | lilis      | imitata     | IMITATA           | IMITATA             | Juanulloa       | mexicana           | no     |
| Melinieini                             | Melinaea    | lilis      | imitata     | IMITATA           | IMITATA             | Merinthopodium  | neuranthum         | no     |
| Napeogenini                            | Hyalyris    | excelsa    | decumana    | DECUMANA          | DECUMANA            | Solanum         | accrescens         | no     |
| Napeogenini                            | Hyalyris    | excelsa    | decumana    | DECUMANA          | DECUMANA            | Solanum         | lanceifolium       | no     |
| Napeogenini                            | Hyalyris    | excelsa    | decumana    | DECUMANA          | DECUMANA            | Solanum         | siparunoides       | no     |
| Napeogenini                            | Hypothyris  | euclea     | valora      | IMITATA           | IMITATA             | Solanum         | rugosum            | no     |
| Napeogenini                            | Hypothyris  | lycaste    | callispila  | SCYLAX            | SCYLAX              | Solanum         | accrescens         | no     |
| Napeogenini                            | Napeogenes  | tolosa     | amara       | SCYLAX            | SCYLAX              | Lycianthes      | multiflora         | no     |
| Oleriini                               | Hyposcada   | virginiana | evanides    | SCYLAX            | SCYLAX              | Columnea        | consanguinea       | no     |
| Oleriini                               | Hyposcada   | virginiana | evanides    | SCYLAX            | SCYLAX              | Columnea        | glabra             | no     |
| Oleriini                               | Hyposcada   | virginiana | evanides    | SCYLAX            | SCYLAX              | Drymonia        | conchocalyx        | no     |
| Oleriini                               | Oleria      | paula      | paula       | PATILLA           | PATILLA             | Lycianthes      | multiflora         | no     |
| Oleriini                               | Oleria      | rubescens  |             | PATILLA           | PATILLA             | Solanum         | siparunoides       | no     |
| Oleriini                               | Oleria      | vicina     |             | SIMPLEX           | SIMPLEX             | Lycianthes      | multiflora         | no     |
| Oleriini                               | Oleria      | vicina     |             | SIMPLEX           | SIMPLEX             | Lycianthes      | synanthera         | no     |
| Oleriini                               | Oleria      | vicina     |             | SIMPLEX           | SIMPLEX             | Solanum         | trizygum           | no     |
| Tithoreini                             | Eutresis    | dilucida   |             | DILUCIDA          | DILUCIDA            | Schultesianthus | megalandrus        | no     |
| Tithoreini                             | Eutresis    | hypereia   | theope      | DILUCIDA          | DILUCIDA            | Schultesianthus | megalandrus        | yes    |
| Tithoreini                             | Eutresis    | hypereia   | theope      | DILUCIDA          | DILUCIDA            | Solandra        | grandiflora        | no     |
| Tithoreini                             | Olyras      | crathis    | staudingeri | DECUMANA          | DECUMANA            | Solandra        | grandiflora        | no     |
| Tithoreini                             | Olyras      | insignis   | insignis    | INSIGNIS          | INSIGNIS            | Schultesianthus | megalandrus        | no     |
| Tithoreini                             | Tithorea    | harmonia   | helicaon    | SCYLAX            | SCYLAX              | Prestonia       | portobellensis     | no     |
| Tithoreini                             | Tithorea    | tarricina  | pinthias    | HEZIA             | HEZIA               | Prestonia       | longifolia         | no     |
| <b>SOUTH-EAST BRAZIL (Brown, 1987)</b> |             |            |             |                   |                     |                 |                    |        |
| Dircennini                             | Dircenna    | dero       | rhoeo       | THEMISTO          | THEMISTO            | Solanum         | mauritianum        | no     |
| Dircennini                             | Dircenna    | dero       | rhoeo       | THEMISTO          | THEMISTO            | Solanum         | megalochiton       | no     |
| Dircennini                             | Dircenna    | dero       | rhoeo       | THEMISTO          | THEMISTO            | Solanum         | paniculatum        | no     |
| Dircennini                             | Dircenna    | dero       | rhoeo       | THEMISTO          | THEMISTO            | Solanum         | robustum           | no     |
| Dircennini                             | Dircenna    | dero       | rhoeo       | THEMISTO          | THEMISTO            | Solanum         | variabile          | no     |
| Dircennini                             | Episcada    | hymenaea   | hymenaea    | HYMENAEA          | HYMENAEA            | Cestrum         | laevigatum         | no     |
| Dircennini                             | Episcada    | hymenaea   | hymenaea    | HYMENAEA          | HYMENAEA            | Cestrum         | schlechtendalianum | no     |
| Dircennini                             | Episcada    | hymenaea   | hymenaea    | HYMENAEA          | HYMENAEA            | Cestrum         | sendtnerianum      | no     |
| Dircennini                             | Episcada    | hymenaea   | hymenaea    | HYMENAEA          | HYMENAEA            | Solanum         | caavurana          | no     |
| Dircennini                             | Episcada    | hymenaea   | hymenaea    | HYMENAEA          | HYMENAEA            | Solanum         | pseudocapsicum     | no     |
| Dircennini                             | Pteronymia  | sylvo      |             | AQUATA            | AQUATA              | Solanum         | swartzianum        | no     |
| Godyridini                             | Mcclungia   | cymo       | salonina    | PHILOCLEA         | PHILOCLEA           | Cestrum         | laevigatum         | no     |
| Godyridini                             | Mcclungia   | cymo       | salonina    | PHILOCLEA         | PHILOCLEA           | Cestrum         | schlechtendalianum | no     |
| Godyridini                             | Mcclungia   | cymo       | salonina    | PHILOCLEA         | PHILOCLEA           | Cestrum         | sendtnerianum      | no     |
| Godyridini                             | Pseudoscada | erruca     |             | AQUATA            | AQUATA              | Cestrum         | laevigatum         | no     |
| Godyridini                             | Pseudoscada | erruca     |             | AQUATA            | AQUATA              | Cestrum         | schlechtendalianum | no     |
| Ithomiini                              | Ithomia     | agnosia    | zikani      | AQUATA            | AQUATA              | Acnistus        | arborescens        | yes    |
| Ithomiini                              | Ithomia     | agnosia    | zikani      | AQUATA            | AQUATA              | Vassobia        | breviflora         | no     |
| Ithomiini                              | Ithomia     | drymo      |             | AQUATA            | AQUATA              | Acnistus        | arborescens        | no     |
| Mechanitini                            | Mechanitis  | lysimmnia  | lysimmnia   | LYSIMNIA          | LYSIMNIA            | Cyphomandra     | divaricata         | no     |
| Mechanitini                            | Mechanitis  | lysimmnia  | lysimmnia   | LYSIMNIA          | LYSIMNIA            | Cyphomandra     | fragrans           | no     |
| Mechanitini                            | Mechanitis  | lysimmnia  | lysimmnia   | LYSIMNIA          | LYSIMNIA            | Cyphomandra     | sciadostylis       | no     |
| Mechanitini                            | Mechanitis  | lysimmnia  | lysimmnia   | LYSIMNIA          | LYSIMNIA            | Lycopersicon    | esculentum         | no     |

Electronic Appendix A Cont. Hostplant records and mimicry classification for five ithomiine communities.

| Tribe                                  | Genus      | Species  | Subspecies | Male mimicry ring | Female mimicry ring | Plant genus  | Plant species   | Delete |
|----------------------------------------|------------|----------|------------|-------------------|---------------------|--------------|-----------------|--------|
| <b>SOUTH-EAST BRAZIL (Brown, 1987)</b> |            |          |            |                   |                     |              |                 |        |
| Mechanitini                            | Mechanitis | lysimnia | lysimnia   | LYSIMNIA          | LYSIMNIA            | Nicandra     | physaloides     | no     |
| Mechanitini                            | Mechanitis | lysimnia | lysimnia   | LYSIMNIA          | LYSIMNIA            | Solanum      | aculeatissimum  | no     |
| Mechanitini                            | Mechanitis | lysimnia | lysimnia   | LYSIMNIA          | LYSIMNIA            | Solanum      | arcuatum        | no     |
| Mechanitini                            | Mechanitis | lysimnia | lysimnia   | LYSIMNIA          | LYSIMNIA            | Solanum      | atropurpureum   | no     |
| Mechanitini                            | Mechanitis | lysimnia | lysimnia   | LYSIMNIA          | LYSIMNIA            | Solanum      | brusquense      | no     |
| Mechanitini                            | Mechanitis | lysimnia | lysimnia   | LYSIMNIA          | LYSIMNIA            | Solanum      | capsicoides     | no     |
| Mechanitini                            | Mechanitis | lysimnia | lysimnia   | LYSIMNIA          | LYSIMNIA            | Solanum      | jatrophiifolium | no     |
| Mechanitini                            | Mechanitis | lysimnia | lysimnia   | LYSIMNIA          | LYSIMNIA            | Solanum      | paniculatum     | no     |
| Mechanitini                            | Mechanitis | lysimnia | lysimnia   | LYSIMNIA          | LYSIMNIA            | Solanum      | robustum        | no     |
| Mechanitini                            | Mechanitis | lysimnia | lysimnia   | LYSIMNIA          | LYSIMNIA            | Solanum      | variabile       | no     |
| Mechanitini                            | Mechanitis | lysimnia | lysimnia   | LYSIMNIA          | LYSIMNIA            | Solanum      | viarum          | no     |
| Mechanitini                            | Mechanitis | polymnia | casabranca | ETHRA             | ETHRA               | Cyphomandra  | fragrans        | no     |
| Mechanitini                            | Mechanitis | polymnia | casabranca | ETHRA             | ETHRA               | Lycopersicon | esculentum      | no     |
| Mechanitini                            | Mechanitis | polymnia | casabranca | ETHRA             | ETHRA               | Solanum      | asperolanatum   | no     |
| Mechanitini                            | Mechanitis | polymnia | casabranca | ETHRA             | ETHRA               | Solanum      | concinnum       | no     |
| Mechanitini                            | Mechanitis | polymnia | casabranca | ETHRA             | ETHRA               | Solanum      | granuloseprosum | no     |
| Mechanitini                            | Mechanitis | polymnia | casabranca | ETHRA             | ETHRA               | Solanum      | mauritanum      | no     |
| Mechanitini                            | Mechanitis | polymnia | casabranca | ETHRA             | ETHRA               | Solanum      | megalochiton    | no     |
| Mechanitini                            | Mechanitis | polymnia | casabranca | ETHRA             | ETHRA               | Solanum      | melongena       | no     |
| Mechanitini                            | Mechanitis | polymnia | casabranca | ETHRA             | ETHRA               | Solanum      | paniculatum     | no     |
| Mechanitini                            | Mechanitis | polymnia | casabranca | ETHRA             | ETHRA               | Solanum      | robustum        | no     |
| Mechanitini                            | Mechanitis | polymnia | casabranca | ETHRA             | ETHRA               | Solanum      | variabile       | no     |
| Mechanitini                            | Methona    | themisto | ssp        | THEMISTO          | THEMISTO            | Brunfelsia   | australis       | no     |
| Mechanitini                            | Methona    | themisto | ssp        | THEMISTO          | THEMISTO            | Brunfelsia   | pauciflora      | no     |
| Mechanitini                            | Methona    | themisto | ssp        | THEMISTO          | THEMISTO            | Brunfelsia   | uniflora        | no     |
| Mechanitini                            | Thyridia   | psidii   | cetoides   | THEMISTO          | THEMISTO            | Cyphomandra  | crassicaulis    | no     |
| Mechanitini                            | Thyridia   | psidii   | cetoides   | THEMISTO          | THEMISTO            | Cyphomandra  | divaricata      | no     |
| Mechanitini                            | Thyridia   | psidii   | cetoides   | THEMISTO          | THEMISTO            | Cyphomandra  | fragrans        | no     |
| Mechanitini                            | Thyridia   | psidii   | cetoides   | THEMISTO          | THEMISTO            | Cyphomandra  | sciadostylis    | no     |
| Napeogenini                            | Epityches  | eupompe  |            | PHILOCLEA         | PHILOCLEA           | Acnistus     | arborescens     | no     |
| Napeogenini                            | Epityches  | eupompe  |            | PHILOCLEA         | PHILOCLEA           | Capsicum     | flexuosum       | no     |
| Napeogenini                            | Hypothyris | euclea   | laphria    | ETHRA             | ETHRA               | Solanum      | granuloseprosum | no     |
| Napeogenini                            | Hypothyris | euclea   | laphria    | ETHRA             | ETHRA               | Solanum      | mauritanum      | no     |
| Napeogenini                            | Hypothyris | ninonia  | daeta      | LYSIMNIA          | LYSIMNIA            | Solanum      | brusquense      | no     |
| Napeogenini                            | Hypothyris | ninonia  | daeta      | LYSIMNIA          | LYSIMNIA            | Solanum      | concinnum       | no     |
| Napeogenini                            | Hypothyris | ninonia  | daeta      | LYSIMNIA          | LYSIMNIA            | Solanum      | insidiosum      | no     |
| Napeogenini                            | Hypothyris | ninonia  | daeta      | LYSIMNIA          | LYSIMNIA            | Solanum      | mauritanum      | no     |
| Napeogenini                            | Hypothyris | ninonia  | daeta      | LYSIMNIA          | LYSIMNIA            | Solanum      | megalochiton    | no     |
| Napeogenini                            | Hypothyris | ninonia  | daeta      | LYSIMNIA          | LYSIMNIA            | Solanum      | murinum         | no     |
| Napeogenini                            | Hypothyris | ninonia  | daeta      | LYSIMNIA          | LYSIMNIA            | Solanum      | paniculatum     | no     |
| Napeogenini                            | Hypothyris | ninonia  | daeta      | LYSIMNIA          | LYSIMNIA            | Solanum      | robustum        | no     |
| Napeogenini                            | Hypothyris | ninonia  | daeta      | LYSIMNIA          | LYSIMNIA            | Solanum      | swartzianum     | no     |
| Napeogenini                            | Hypothyris | ninonia  | daeta      | LYSIMNIA          | LYSIMNIA            | Solanum      | variabile       | no     |
| New Tribe                              | Aeria      | olena    | olena      | AGNA              | AGNA                | Prestonia    | coalita         | no     |
| New Tribe                              | Aeria      | olena    | olena      | AGNA              | AGNA                | Prestonia    | dusenii         | no     |
| Tithoreini                             | Tithorea   | harmonia | pseudethra | ETHRA             | ETHRA               | Peltastes    | peltatus        | no     |
| Tithoreini                             | Tithorea   | harmonia | pseudethra | ETHRA             | ETHRA               | Prestonia    | acutifolia      | no     |
| Tithoreini                             | Tithorea   | harmonia | pseudethra | ETHRA             | ETHRA               | Prestonia    | coalita         | no     |

Electronic Appendix A Cont. Hostplant records and mimicry classification for five ithomiine communities.

| Tribe                                  | Genus    | Species  | Subspecies | Male mimicry ring | Female mimicry ring | Plant genus | Plant species | Delete |
|----------------------------------------|----------|----------|------------|-------------------|---------------------|-------------|---------------|--------|
| <b>SOUTH-EAST BRAZIL (Brown, 1987)</b> |          |          |            |                   |                     |             |               |        |
| Tithoreini                             | Tithorea | harmonia | pseudethra | ETHRA             | ETHRA               | Prestonia   | dusenii       | no     |
| Tithoreini                             | Tithorea | harmonia | pseudethra | ETHRA             | ETHRA               | Temnadenia  | violacea      | no     |

'Delete' column refers to whether or not records were deleted to correct for close phylogenetic relationships.



Electronic Appendix B Mimicry classification. Patterns occurring in more than one community are listed only once.

| Mimicry complex classification |                          |                                                              | Mimicry characters (see below) |    |    |   |   |    |    |   |    |   |    |    |    |    | Comments |    |    |                                                                                                                  |
|--------------------------------|--------------------------|--------------------------------------------------------------|--------------------------------|----|----|---|---|----|----|---|----|---|----|----|----|----|----------|----|----|------------------------------------------------------------------------------------------------------------------|
| This paper                     | Beccaloni (1997a)        | Drummond (1976)                                              | Haber (1978)                   | 1  | 2  | 3 | 4 | 5  | 6  | 7 | 8  | 9 | 10 | 11 | 12 | 13 |          | 14 | 15 | 16                                                                                                               |
| <b>ECUADOR NORTH MONTANE</b>   |                          |                                                              |                                |    |    |   |   |    |    |   |    |   |    |    |    |    |          |    |    |                                                                                                                  |
| SUSIANA                        | -                        | -                                                            | -                              | 26 | 19 | 2 | 0 | 7  | 5  | 0 | 19 | 0 | 0  | 5  | 0  | 6  | 0        | 0  | 0  |                                                                                                                  |
| BANJANA-M                      | -                        | -                                                            | -                              | 26 | 7  | 2 | 0 | 4  | 5  | 0 | 18 | 0 | 0  | 9  | 0  | 6  | 0        | 0  | 0  |                                                                                                                  |
| OCNA                           | -                        | -                                                            | -                              | 24 | 0  | 0 | 0 | 9  | 7  | 0 | 17 | 0 | 0  | 6  | 1  | 1  | 5        | 0  | 0  |                                                                                                                  |
| TICIDA-M                       | -                        | -                                                            | -                              | 14 | 20 | 0 | 0 | 10 | 8  | 3 | 23 | 0 | 0  | 12 | 0  | 1  | 5        | 0  | 0  |                                                                                                                  |
| PANTHYALE                      | -                        | -                                                            | -                              | 13 | 17 | 0 | 4 | 10 | 9  | 1 | 23 | 0 | 0  | 13 | 0  | 3  | 0        | 0  | 0  |                                                                                                                  |
| OZIA                           | -                        | -                                                            | -                              | 14 | 20 | 0 | 0 | 10 | 7  | 0 | 21 | 0 | 0  | 10 | 1  | 1  | 2        | 0  | 0  |                                                                                                                  |
| HEWITSONI                      | -                        | -                                                            | -                              | 30 | 8  | 0 | 4 | 8  | 10 | 5 | 22 | 0 | 0  | 11 | 0  | 4  | 0        | 0  | 0  |                                                                                                                  |
| JOICEYI                        | -                        | -                                                            | -                              | 20 | 12 | 0 | 3 | 0  | 6  | 5 | 10 | 2 | 0  | 4  | 0  | 0  | 6        | 0  | 0  | 0 VFW discocellular spot black                                                                                   |
| DUILLIA                        | -                        | -                                                            | -                              | 17 | 20 | 0 | 1 | 10 | 11 | 0 | 14 | 0 | 0  | 16 | 0  | 2  | 0        | 0  | 0  |                                                                                                                  |
| LIBETHRIS                      | -                        | -                                                            | -                              | 10 | 16 | 0 | 4 | 8  | 7  | 0 | 3  | 0 | 0  | 10 | 0  | 3  | 4        | 0  | 0  |                                                                                                                  |
| <b>ECUADOR SOUTH MONTANE</b>   |                          |                                                              |                                |    |    |   |   |    |    |   |    |   |    |    |    |    |          |    |    |                                                                                                                  |
| ANTEA                          | -                        | -                                                            | -                              | 23 | 0  | 0 | 0 | 8  | 1  | 0 | 15 | 0 | 0  | 2  | 0  | 1  | 5        | 0  | 0  |                                                                                                                  |
| MESTRA                         | -                        | -                                                            | -                              | 23 | 0  | 0 | 0 | 8  | 7  | 0 | 16 | 0 | 0  | 6  | 0  | 1  | 3        | 0  | 0  |                                                                                                                  |
| APULEIA                        | -                        | -                                                            | -                              | 18 | 7  | 0 | 3 | 10 | 8  | 0 | 6  | 0 | 0  | 12 | 0  | 6  | 0        | 0  | 0  |                                                                                                                  |
| ZALMUNNA                       | -                        | -                                                            | -                              | 16 | 18 | 0 | 0 | 8  | 9  | 0 | 4  | 3 | 0  | 3  | 0  | 6  | 6        | 0  | 0  | 0 Geographic variant of JOICEYI                                                                                  |
| LAUTA                          | -                        | -                                                            | -                              | 16 | 17 | 0 | 4 | 10 | 10 | 0 | 7  | 0 | 0  | 13 | 0  | 3  | 0        | 0  | 0  |                                                                                                                  |
| DERCYLLIDAS                    | -                        | -                                                            | -                              | 22 | 1  | 0 | 5 | 6  | 3  | 2 | 13 | 0 | 1  | 8  | 0  | 3  | 1        | 0  | 0  |                                                                                                                  |
| AMICA                          | -                        | -                                                            | -                              | 2  | 9  | 5 | 6 | 11 | 4  | 4 | 0  | 0 | 0  | 0  | 1  | 5  | 0        | 0  | 0  |                                                                                                                  |
| <b>ECUADOR LOWLAND</b>         |                          |                                                              |                                |    |    |   |   |    |    |   |    |   |    |    |    |    |          |    |    |                                                                                                                  |
| AGNOSIA                        | Clearwing                | White transparent                                            | -                              | 12 | 14 | 0 | 0 | 4  | 7  | 0 | 24 | 0 | 0  | 10 | 0  | 6  | 0        | 0  | 0  |                                                                                                                  |
| LERIDA                         | Small Dark Transparent   | White transparent                                            | -                              | 25 | 2  | 1 | 0 | 4  | 0  | 0 | 18 | 0 | 0  | 8  | 0  | 6  | 0        | 0  | 0  |                                                                                                                  |
| AURELIANA                      | Orange-tip               | Orange-tip transparent                                       | -                              | 8  | 13 | 0 | 2 | 10 | 8  | 0 | 24 | 0 | 0  | 8  | 0  | 6  | 0        | 0  | 0  |                                                                                                                  |
| CONFUSA                        | Large Yellow Transparent | Yellow clearwing transparent;<br>Large transparent clearwing | -                              | 27 | 4  | 1 | 0 | 8  | 7  | 0 | 20 | 1 | 0  | 10 | 1  | 1  | 0        | 1  | 1  |                                                                                                                  |
| SALAPIA                        | Small Yellow Transparent | Yellow clearwing transparent                                 | -                              | 19 | 1  | 0 | 0 | 4  | 7  | 0 | 8  | 0 | 0  | 8  | 1  | 6  | 0        | 0  | 0  |                                                                                                                  |
| DERASA                         | Small Yellow Transparent | Yellow opaque transparent                                    | -                              | 19 | 1  | 0 | 0 | 4  | 2  | 6 | 8  | 1 | 0  | 2  | 0  | 6  | 0        | 0  | 0  |                                                                                                                  |
| HERMIAS                        | Tiger                    | Yellow, orange and black Tiger;<br>Yellow spot canopy Tiger  | -                              | 5  | 10 | 5 | 6 | 3  | 4  | 4 | 0  | 0 | 3  | 10 | 1  | 6  | 0        | 0  | 0  |                                                                                                                  |
| MAMERCUS                       | Yellow-bar Tiger         | Yellow-bar canopy Tiger                                      | -                              | 2  | 9  | 5 | 6 | 11 | 4  | 4 | 0  | 0 | 2  | 15 | 1  | 5  | 0        | 0  | 0  |                                                                                                                  |
| MOTHONE                        | Orange and black Tiger   | Orange and black Tiger                                       | -                              | 0  | 9  | 5 | 5 | 11 | 4  | 4 | 0  | 0 | 2  | 15 | 1  | 5  | 0        | 0  | 0  |                                                                                                                  |
| <b>COSTA RICA</b>              |                          |                                                              |                                |    |    |   |   |    |    |   |    |   |    |    |    |    |          |    |    |                                                                                                                  |
| SIMPLEX                        | -                        | -                                                            | Clearwing                      | 11 | 15 | 0 | 0 | 10 | 8  | 0 | 24 | 0 | 0  | 1  | 0  | 6  | 0        | 0  | 0  | 0 Members are montane and increase opacity of white forewing spots from SE to NW Central America, unlike PATILLA |
| PATILLA                        | -                        | -                                                            | Clearwing                      | 12 | 14 | 0 | 0 | 5  | 7  | 0 | 24 | 0 | 0  | 1  | 0  | 6  | 0        | 0  | 0  |                                                                                                                  |
| AGNA                           | -                        | -                                                            | Black and yellow               | 19 | 1  | 0 | 0 | 4  | 4  | 0 | 8  | 0 | 0  | 8  | 1  | 6  | 0        | 0  | 0  | 0 Geographic variant of SALAPIA                                                                                  |
| INSIGNIS                       | -                        | -                                                            | Black and yellow               | 28 | 3  | 2 | 0 | 8  | 7  | 0 | 9  | 0 | 0  | 8  | 1  | 1  | 0        | 0  | 0  | 0 Reduction in intensity of yellow from C. America to W. Ecuador not matched by AGNA or DILUCIDA members         |
| DILUCIDA                       | -                        | -                                                            | Golden-translucent             | 29 | 3  | 2 | 0 | 8  | 7  | 0 | 12 | 0 | 0  | 10 | 1  | 1  | 0        | 0  | 0  |                                                                                                                  |

Electronic Appendix B Cont. Mimicry classification. Patterns occurring in more than one community are listed only once.

| This paper               | Mimicry complex classification |                 |                | Mimicry characters (see below) |    |   |   |    |   |   |    |   |    |    |    |    |    |    |    | Comments                                                                                                                                                              |
|--------------------------|--------------------------------|-----------------|----------------|--------------------------------|----|---|---|----|---|---|----|---|----|----|----|----|----|----|----|-----------------------------------------------------------------------------------------------------------------------------------------------------------------------|
|                          | Beccaloni (1997a)              | Drummond (1976) | Haber (1978)   | 1                              | 2  | 3 | 4 | 5  | 6 | 7 | 8  | 9 | 10 | 11 | 12 | 13 | 14 | 15 | 16 |                                                                                                                                                                       |
| <b>COSTA RICA</b>        |                                |                 |                |                                |    |   |   |    |   |   |    |   |    |    |    |    |    |    |    |                                                                                                                                                                       |
| DECUMANA                 | -                              | -               | Black and rust | 6                              | 5  | 7 | 0 | 3  | 4 | 0 | 2  | 0 | 0  | 7  | 1  | 1  | 0  | 0  | 0  |                                                                                                                                                                       |
| HEZIA                    | -                              | -               | Black and rust | 7                              | 19 | 7 | 0 | 3  | 4 | 0 | 0  | 0 | 0  | 14 | 0  | 1  | 0  | 0  | 0  | 0 HEZIA members show parallel variation in Colombia not followed by DECUMANA members                                                                                  |
| SCYLAX                   | -                              | -               | Tiger          | 3                              | 6  | 6 | 6 | 3  | 4 | 0 | 0  | 0 | 1  | 10 | 1  | 1  | 0  | 0  | 0  |                                                                                                                                                                       |
| IMITATA                  | -                              | -               | Tiger          | 3                              | 6  | 6 | 6 | 3  | 4 | 4 | 0  | 0 | 0  | 10 | 1  | 1  | 0  | 0  | 0  | 0 Most members also have end FW discal cell yellow (orange in IMITATA)                                                                                                |
| <b>SOUTH-EAST BRAZIL</b> |                                |                 |                |                                |    |   |   |    |   |   |    |   |    |    |    |    |    |    |    |                                                                                                                                                                       |
| AQUATA                   | -                              | -               | -              | 21                             | 15 | 3 | 0 | 8  | 7 | 0 | 11 | 0 | 0  | 10 | 0  | 3  | 0  | 0  | 0  |                                                                                                                                                                       |
| HYMENAEA                 | -                              | -               | -              | 9                              | 17 | 0 | 4 | 10 | 8 | 5 | 3  | 0 | 0  | 10 | 0  | 3  | 4  | 0  | 0  |                                                                                                                                                                       |
| PHILOCLEA                | -                              | -               | -              | 15                             | 15 | 0 | 0 | 8  | 7 | 0 | 5  | 0 | 0  | 8  | 0  | 6  | 4  | 0  | 0  |                                                                                                                                                                       |
| THEMISTO                 | -                              | -               | -              | 27                             | 4  | 1 | 0 | 8  | 7 | 0 | 20 | 1 | 0  | 10 | 1  | 1  | 0  | 1  | 1  | 1 Geographic variant of CONFUSA                                                                                                                                       |
| ETHRA                    | -                              | -               | -              | 4                              | 1  | 2 | 6 | 2  | 4 | 0 | 1  | 0 | 1  | 8  | 0  | 1  | 0  | 0  | 0  |                                                                                                                                                                       |
| LYSIMNIA                 | -                              | -               | -              | 1                              | 11 | 4 | 6 | 1  | 4 | 5 | 1  | 0 | 1  | 8  | 1  | 1  | 0  | 0  | 0  | 0 Differs from ETHRA principally in white DFW subapical spot; <i>Mechanitis lysimnia</i> has both ETHRA and LYSIMNIA patterns, which are otherwise broadly sympatric. |

**Mimicry characters**

**1. DFW ground colour (wing excluding black marginal and discal markings)**

0: opaque; orange. 1: opaque; orange, yellow discal band, white subapical spot. 2: opaque; orange, yellow postdiscal band. 3: opaque; orange, yellow postdiscal band and subapical spots. 4: opaque; orange, yellow postdiscal band, yellow subapical spot. 5: opaque; orange, scattered yellow postdiscal and subapical markings. 6: opaque; yellow, large subapical, submarginal, postdiscal and discal spots. 7: opaque; yellow, small, subapical, submarginal, postdiscal and discal spots. 8: translucent/opaque; colourless, very broad orange postdiscal band. 9: translucent; colourless. 10: translucent; colourless, opaque yellow postdiscal band and tornal spot. 11: translucent; colourless, white postdiscal and subapical spots. 12: translucent; colourless, white postdiscal band. 13: translucent; colourless, white postdiscal, tornal and apical spots. 14: translucent; colourless, yellow base discal cell. 15: translucent; colourless, yellow discal and postdiscal band. 16: translucent; colourless, yellow postdiscal, tornal and submarginal spots. 17: translucent; colourless, yellow/orange in distal half. 18: translucent; colourless, yellowish postdiscal band. 19: translucent; dense yellow. 20: translucent; dense yellow/orange. 21: translucent; faint white to colourless. 22: translucent; pale green/brown. 23: translucent; smoky grey. 24: translucent; smoky grey, yellow base discal cell. 25: translucent; white discal, postdiscal and submarginal spots. 26: translucent; whitish, broken postdiscal band, subapical and subapical spots. 27: translucent; yellow. 28: translucent; yellow, large, partially fused, submarginal, postdiscal and discal spots. 29: translucent; yellow, large, partially fused, submarginal, postdiscal and discal spots, orange along cubital vein. 30: translucent; yellow/orange.

**2. DFW discal band**

0: absent. 1: black; broad band. 2: black; broad band, extending to anal margin base Cu2-Cu1 and distal margin along M3. 3: black; broad bar extending as dark scaling along veins. 4: black; broad, even band. 5: black; broad, into base cell Cu2-Cu1, extending along veins M3 and M2. 6: black; broad, uneven band. 7: black; discocellular bar. 8: black; discocellular spot. 9: black; discocellular spots. 10: black; disjointed band. 11: black; fused with apex. 12: black; large, uneven discocellular spot. 13: black; narrow bar. 14: black; tapering band. 15: black; thick discocellular bar. 16: black; thin bar. 17: black; thin discocellular bar. 18: black; uneven discocellular spot. 19: black; very broad band, into base cell Cu2-Cu1, extending along veins M3 and M2. 20: black; very thin discocellular line.

**3. DFW cell bar**

0: absent. 1: black; bar. 2: black; broad bar. 3: black; line. 4: black; oval spot. 5: black; spot. 6: black; thick bar. 7: black; very broad filling basal third wing.

**4. DFW costa**

0: black. 1: black then yellow/orange distal of discocellulars. 2: black/orange. 3: orange. 4: orange to basal of discocellulars, then black. 5: orange/black. 6: orange/yellow/black.

**5. DFW apex**

0: black, white subapical spot; quadrate marking. 1: black, white subapical spot; very broad (apical third). 2: black, yellow subapical spot; very broad (apical third). 3: black, yellow subapical spots; very broad (apical third). 4: black; broad. 5: black; broad, extending to white postdiscal band. 6: black; broad, subapical green/brown spots. 7: black; broad, with white subapical and apical spots. 8: black; medium. 9: black, white subapical spots; medium. 10: black; narrow. 11: black; very broad (apical third).

## Electronic Appendix B Cont. Mimicry classification.

### Mimicry characters

#### 6. DFW distal margin

**0:** black with orange submarginal line; fused. **1:** black with white spots; medium, even. **2:** black with white submarginal spots; medium, even. **3:** black, medium, crenellated. **4:** black; broad, fused. **5:** black; crenellated. **6:** black; highly serrate. **7:** black; medium, even. **8:** black; narrow, even. **9:** black; narrow, serrate. **10:** black; narrow, slightly serrate. **11:** black; very narrow, slightly serrate.

#### 7. DFW anal margin

**0:** black. **1:** black, orange at base. **2:** black, orange cubital vein. **3:** black, yellow at very base. **4:** orange. **5:** orange and black. yellow and black.

#### 8. DHW ground colour

**0:** opaque; orange. **1:** opaque; yellow discal area, orange postdiscal area. **2:** semi-opaque; orange. **3:** translucent; colourless. **4:** translucent; colourless, large yellow subapical and submarginal spots. **5:** translucent; colourless, yellow in discal cell and basal two thirds. **6:** translucent; colourless, yellowish discal band. **7:** translucent; colourless, yellowish submarginal spots. **8:** translucent; dense yellow. **9:** translucent; dense yellow, orange at distal edge in posterior half. **10:** translucent; dense yellow/orange. **11:** translucent; faint white to colourless. **12:** translucent; orange, becoming yellow in middle. **13:** translucent; pale green/brown. **14:** translucent; pale whitish to colourless, yellowish submarginal spots, broad red-brown anal margin. **15:** translucent; smoky grey. **16:** translucent; smoky grey, yellow in basal half. **17:** translucent; smoky grey, yellow in basal half, orange along anal margin. **18:** translucent; whitish. **19:** translucent; whitish, discal cell black. **20:** translucent; yellow. **21:** translucent; yellow in discal cell and basal two thirds. **22:** translucent; yellow/orange. **23:** translucent; yellow/orange in discal cell and cells posterior of vein Cu1, white submarginal spots in apex. **24:** transparent; colourless.

#### 9. DHW discocellular marking

**0:** absent. **1:** black; band. **2:** black; large discocellular spot. **3:** black; narrow discocellular spot.

#### 10. DHW discal band

**0:** absent. **1:** black; broad band. **2:** black; fused with margin. **3:** black; line of spots.

#### 11. DHW distal margin

**0:** absent. **1:** black with narrow dark orange line; medium, even. **2:** black with white submarginal spots; broad, even. **3:** black with white submarginal spots; medium, dentate. **4:** black with white submarginal spots; very broad, dentate. **5:** black with white submarginal spots; very broad, extending along veins, even. **6:** black with/without white submarginal spots; broad, even. **7:** black, yellow submarginal spots; broad, slightly broader at apex, even. **8:** black; broad, even. **9:** black; broad, slightly dentate. **10:** black; medium, even. **11:** black; medium, serrate. **12:** black; narrow, even. **13:** black; narrow, serrate. **14:** black; very broad at apex, tapering towards tornus, even. **15:** black; very broad, fused with discal band. **16:** dark brown; very narrow in cells Cu2-M3, very broad in (almost filling) cell M3-M2.

#### 12. Antennal clubs

**0:** black. **1:** yellow.

#### 13. VHW distal margin

**0:** black, large white submarginal spots. **1:** black, white submarginal spots. **2:** dark brown; very narrow in cells Cu2-M3, very broad in (almost filling) cell M3-M2. **3:** orange. **4:** orange and black, small white submarginal spots. **5:** orange/black. **6:** orange/black, white submarginal spots.

#### 14. VHW base costa

**0:** same as margins or variable. **1:** green, broad band. **2:** orange triangle. **3:** white spot. **4:** yellow stripe. **5:** yellow triangle. **6:** yellow/orange triangle.

#### 15. Ventral thorax

**0:** black with yellow/white stripes. **1:** black with white spots.

#### 16. Ventral abdomen

**0:** yellow/white. **1:** black with white dashes.

Electronic Appendix C Matching interactions between pairs of ithomiine taxa, mimicry complex and larval hostplant.

| PLANT GENUS                              | PLANT SPECIES      | MIMICRY   | ITHOMIINE TAXON 1              | ITHOMIINE TAXON 2           | TRIBE | GENUS | SPECIES | CLOSELY RELATED SPP |
|------------------------------------------|--------------------|-----------|--------------------------------|-----------------------------|-------|-------|---------|---------------------|
| <b>ECUADOR NORTH MONTANE, MALE</b>       |                    |           |                                |                             |       |       |         |                     |
| Cestrum                                  | megalophyllum      | PANTHYALE | Greta enigma ssp               | Greta ortygia ortygia       |       |       | X       |                     |
| Cestrum                                  | microcalyx         | DUILLIA   | Greta alphisiboea              | Godyris duillia             |       | X     |         |                     |
| Cestrum                                  | sp1                | PANTHYALE | Greta enigma ssp               | Godyris panthyale panthyale |       | X     |         |                     |
| Lycianthes                               | multiflora         | AGNOSIA   | Oleria makrena makrenita       | Pteronymia artema afrania   | X     |       |         |                     |
| Solanum                                  | asperum            | EQUATORIA | Hyaliris ocna ssp              | Dircenna adina lorica       | X     |       |         |                     |
| Solanum                                  | deflexiflorum      | HEWITSONI | Pteronymia oneida oneida       | Pteronymia serrata ssp      |       |       | X       |                     |
| Solanum                                  | nutans             | HEWITSONI | Pteronymia alida ssp           | Pteronymia serrata ssp      |       |       |         | X                   |
| Solanum                                  | sect. Torva3       | EQUATORIA | Hyaliris ocna ssp              | Dircenna adina lorica       | X     |       |         |                     |
| <b>ECUADOR NORTH MONTANE, FEMALE</b>     |                    |           |                                |                             |       |       |         |                     |
| Cestrum                                  | megalophyllum      | PANTHYALE | Greta enigma ssp               | Greta ortygia ortygia       |       |       | X       |                     |
| Cestrum                                  | microcalyx         | DUILLIA   | Greta alphisiboea              | Godyris duillia             |       | X     |         |                     |
| Cestrum                                  | sp1                | PANTHYALE | Greta enigma ssp               | Godyris panthyale panthyale |       | X     |         |                     |
| Lycianthes                               | multiflora         | AGNOSIA   | Oleria makrena makrenita       | Pteronymia artema afrania   | X     |       |         |                     |
| Solanum                                  | asperum            | EQUATORIA | Hyaliris ocna ssp              | Dircenna adina lorica       | X     |       |         |                     |
| Solanum                                  | deflexiflorum      | HEWITSONI | Pteronymia oneida oneida       | Pteronymia serrata ssp      |       |       | X       |                     |
| Solanum                                  | nudum              | HEWITSONI | Pteronymia sp                  | Pteronymia serrata ssp      |       |       |         | X                   |
| Solanum                                  | nutans             | HEWITSONI | Pteronymia alida ssp           | Pteronymia serrata ssp      |       |       | X       |                     |
| Solanum                                  | sect. Torva3       | EQUATORIA | Hyaliris ocna ssp              | Dircenna adina lorica       | X     |       |         |                     |
| Solanum                                  | aphyodendron       | AGNOSIA   | Episcada mira                  | Pteronymia alissa andreas   |       | X     |         |                     |
| <b>ECUADOR SOUTH MONTANE, BOTH SEXES</b> |                    |           |                                |                             |       |       |         |                     |
| Cestrum                                  | sp1                | PANTHYALE | Greta enigma ssp               | Godyris panthyale panthyale |       | X     |         |                     |
| <b>ECUADOR LOWLAND, BOTH SEXES</b>       |                    |           |                                |                             |       |       |         |                     |
| Cestrum                                  | sp. (7324)         | AGNOSIA   | Heterosais giulia nephele      | Pseudoscada timna ssp       |       | X     |         |                     |
| Solanum                                  | sp. (7334)         | HERMIAS   | Mechanitis lysimnia roqueensis | Mechanitis polymnia ssp     |       |       |         | X                   |
| <b>COSTA RICA, MALE</b>                  |                    |           |                                |                             |       |       |         |                     |
| Cestrum                                  | fragile            | SIMPLEX   | Greta annette championi        | Greta polissena umbrana     |       |       | X       |                     |
| Cestrum                                  | irazuense          | SIMPLEX   | Greta annette championi        | Greta polissena umbrana     |       |       | X       |                     |
| Cestrum                                  | megalophyllum      | SIMPLEX   | Greta annette championi        | Greta polissena umbrana     |       |       | X       |                     |
| Cestrum                                  | rugulosum          | SIMPLEX   | Greta annette championi        | Greta polissena umbrana     |       |       | X       |                     |
| Cestrum                                  | sp. "Button Berry" | SIMPLEX   | Greta annette championi        | Greta polissena umbrana     |       |       | X       |                     |
| Cuatresia                                | riparia            | SCYLAX    | Ithomia celemia plaginota      | Ithomia heraldica           |       |       |         | X                   |
| Lycianthes                               | multiflora         | SIMPLEX   | Pteronymia artema ssp          | Oleria vicina               | X     |       |         |                     |
| Lycianthes                               | multiflora         | PATILLA   | Oleria paula paula             | Ithomia patilla             | X     |       |         |                     |
| Lycianthes                               | synanthera         | SIMPLEX   | Pteronymia artema ssp          | Oleria vicina               | X     |       |         |                     |
| Schultesiaanthus                         | megalandrus        | DILUCIDA  | Eutresis hypereia              | Eutresis dilucida           |       |       |         | X                   |
| Solanum                                  | aphyodendron       | SIMPLEX   | Pteronymia simplex simplex     | Episcada salvinia opleri    |       | X     |         |                     |
| Solanum                                  | chrysotrichum      | DILUCIDA  | Dircenna dero ssp              | Dircenna klugii klugii      |       |       |         | X                   |
| Solanum                                  | chrysotrichum      | IMITATA   | Mechanitis menapis saturata    | Mechanitis polymnia isthmia |       |       |         | X                   |
| Solanum                                  | rudemannum         | DILUCIDA  | Dircenna dero ssp              | Dircenna klugii klugii      |       |       |         | X                   |
| Solanum                                  | rugosum            | IMITATA   | Mechanitis lysimnia utemaia    | Mechanitis polymnia isthmia |       |       |         | X                   |
| Solanum                                  | rugosum            | IMITATA   | Hypothyris euclea valora       | Mechanitis polymnia isthmia | X     |       |         |                     |
| Solanum                                  | rugosum            | IMITATA   | Hypothyris euclea valora       | Mechanitis lysimnia utemaia | X     |       |         |                     |

Electronic Appendix C Cont. Matching interactions between pairs of ithomiine taxa, mimicry complex and larval hostplant.

| PLANT GENUS                          | PLANT SPECIES      | MIMICRY  | ITHOMIINE TAXON 1              | ITHOMIINE TAXON 2             | TRIBE | GENUS | SPECIES | CLOSELY RELATED SPP |
|--------------------------------------|--------------------|----------|--------------------------------|-------------------------------|-------|-------|---------|---------------------|
| <b>COSTA RICA, MALE</b>              |                    |          |                                |                               |       |       |         |                     |
| Solanum                              | siparunoides       | IMITATA  | Mechanitis lysimnia utemaia    | Mechanitis menapis saturata   |       |       |         | X                   |
| Solanum                              | siparunoides       | IMITATA  | Mechanitis menapis saturata    | Mechanitis polymnia isthmia   |       |       |         | X                   |
| Solanum                              | siparunoides       | IMITATA  | Mechanitis lysimnia utemaia    | Mechanitis polymnia isthmia   |       |       |         | X                   |
| Solanum                              | tuerckheimii       | DILUCIDA | Pteronymia picta notilla       | Pteronymia latilla fulvescens |       |       | X       |                     |
| Witheringia                          | meiantha           | PATILLA  | Ithomia patilla                | Ithomia diasia hippocrenis    |       |       |         | X                   |
| <b>COSTA RICA, FEMALE</b>            |                    |          |                                |                               |       |       |         |                     |
| Cestrum                              | fragile            | SIMPLEX  | Greta annette championi        | Greta polissena umbrana       |       |       | X       |                     |
| Cestrum                              | irazuense          | SIMPLEX  | Greta annette championi        | Greta polissena umbrana       |       |       | X       |                     |
| Cestrum                              | megalophyllum      | SIMPLEX  | Greta annette championi        | Greta polissena umbrana       |       |       | X       |                     |
| Cestrum                              | rugulosum          | SIMPLEX  | Greta annette championi        | Greta polissena umbrana       |       |       | X       |                     |
| Cestrum                              | sp. "Button Berry" | SIMPLEX  | Greta annette championi        | Greta polissena umbrana       |       |       | X       |                     |
| Cuatresia                            | riparia            | SCYLAX   | Ithomia celemia plaginota      | Ithomia heraldica             |       |       |         | X                   |
| Lycianthes                           | multiflora         | PATILLA  | Pteronymia artema ssp          | Oleria vicina                 |       | X     |         |                     |
| Lycianthes                           | multiflora         | SIMPLEX  | Oleria paula paula             | Ithomia patilla               |       | X     |         |                     |
| Lycianthes                           | synanthera         | SIMPLEX  | Pteronymia artema ssp          | Oleria vicina                 |       | X     |         |                     |
| Schultesiaanthus                     | megalandrus        | DILUCIDA | Eutresis hypereia              | Eutresis dilucida             |       |       |         | X                   |
| Solanum                              | aphyodendron       | SIMPLEX  | Pteronymia simplex simplex     | Episcada salvinia opleri      |       | X     |         |                     |
| Solanum                              | chrysotrichum      | IMITATA  | Mechanitis menapis saturata    | Mechanitis polymnia isthmia   |       |       |         | X                   |
| Solanum                              | chrysotrichum      | SCYLAX   | Dircenna dero ssp              | Dircenna olyras relata        |       |       |         | X                   |
| Solanum                              | rudepannum         | SCYLAX   | Dircenna dero ssp              | Dircenna olyras relata        |       |       |         | X                   |
| Solanum                              | rugosum            | IMITATA  | Mechanitis lysimnia utemaia    | Mechanitis polymnia isthmia   |       |       |         | X                   |
| Solanum                              | rugosum            | IMITATA  | Hypothyris euclea valora       | Mechanitis polymnia isthmia   |       | X     |         |                     |
| Solanum                              | rugosum            | IMITATA  | Hypothyris euclea valora       | Mechanitis lysimnia utemaia   |       | X     |         |                     |
| Solanum                              | siparunoides       | IMITATA  | Mechanitis lysimnia utemaia    | Mechanitis menapis saturata   |       |       |         | X                   |
| Solanum                              | siparunoides       | IMITATA  | Mechanitis menapis saturata    | Mechanitis polymnia isthmia   |       |       |         | X                   |
| Solanum                              | siparunoides       | IMITATA  | Mechanitis lysimnia utemaia    | Mechanitis polymnia isthmia   |       |       |         | X                   |
| Witheringia                          | meiantha           | PATILLA  | Ithomia patilla                | Ithomia diasia hippocrenis    |       |       |         | X                   |
| <b>SOUTH-EAST BRAZIL, BOTH SEXES</b> |                    |          |                                |                               |       |       |         |                     |
| Acnistus                             | arborescens        | AQUATA   | Ithomia agnosia zikani         | Ithomia drymo                 |       |       |         | X                   |
| Solanum                              | brusquense         | LYSIMNIA | Mechanitis lysimnia lysimnia   | Hypothyris ninonia daeta      |       | X     |         |                     |
| Solanum                              | granuloseprosum    | ETHRA    | Mechanitis polymnia casabranca | Hypothyris euclea laphria     |       | X     |         |                     |
| Solanum                              | mauritanium        | ETHRA    | Mechanitis polymnia casabranca | Hypothyris euclea laphria     |       | X     |         |                     |
| Solanum                              | paniculatum        | LYSIMNIA | Mechanitis lysimnia lysimnia   | Hypothyris ninonia daeta      |       | X     |         |                     |
| Solanum                              | robustum           | LYSIMNIA | Mechanitis lysimnia lysimnia   | Hypothyris ninonia daeta      |       | X     |         |                     |
| Solanum                              | variabile          | LYSIMNIA | Mechanitis lysimnia lysimnia   | Hypothyris ninonia daeta      |       | X     |         |                     |

Electronic Appendix D Pairs of co-mimetic ithomiine taxa recorded on the same hostplants.

| ITHOMIINE TAXON 1                     | ITHOMIINE TAXON 2                    | TRIBE | GENUS | SPECIES GROUP | CLOSELY RELATED |
|---------------------------------------|--------------------------------------|-------|-------|---------------|-----------------|
| <i>Dircenna dero</i> ssp              | <i>Dircenna klugii klugii</i>        |       |       |               | X               |
| <i>Dircenna dero</i> ssp              | <i>Dircenna olyras relata</i>        |       |       |               | X               |
| <i>Episcada mira</i>                  | <i>Pteronymia alissa andreas</i>     |       | X     |               |                 |
| <i>Eutresis hypereia</i>              | <i>Eutresis dilucida</i>             |       |       |               | X               |
| <i>Heterosais giulia nephele</i>      | <i>Pseudoscada timna</i> ssp         |       | X     |               |                 |
| <i>Hyaliris ocna</i> ssp              | <i>Dircenna adina lorica</i>         | X     |       |               |                 |
| <i>Hypothyris euclea valora</i>       | <i>Mechanitis lysimnia utemaia</i>   | X     |       |               |                 |
| <i>Hypothyris euclea valora</i>       | <i>Mechanitis polymnia isthmia</i>   | X     |       |               |                 |
| <i>Ithomia agnosia zikani</i>         | <i>Ithomia drymo</i>                 |       |       |               | X               |
| <i>Ithomia celemia plaginota</i>      | <i>Ithomia heraldica</i>             |       |       |               | X               |
| <i>Ithomia patilla</i>                | <i>Ithomia diasia hippocrenis</i>    |       |       |               | X               |
| <i>Mechanitis lysimnia lysimnia</i>   | <i>Hypothyris ninonia daeta</i>      | X     |       |               |                 |
| <i>Mechanitis lysimnia roqueensis</i> | <i>Mechanitis polymnia</i> ssp       |       |       |               | X               |
| <i>Mechanitis lysimnia utemaia</i>    | <i>Mechanitis menapis saturata</i>   |       |       |               | X               |
| <i>Mechanitis lysimnia utemaia</i>    | <i>Mechanitis polymnia isthmia</i>   |       |       |               | X               |
| <i>Mechanitis menapis saturata</i>    | <i>Mechanitis polymnia isthmia</i>   |       |       |               | X               |
| <i>Mechanitis polymnia casabranca</i> | <i>Hypothyris euclea laphria</i>     | X     |       |               |                 |
| <i>Oleria makrena makrenita</i>       | <i>Pteronymia artena afrania</i>     | X     |       |               |                 |
| <i>Oleria paula paula</i>             | <i>Ithomia patilla</i>               | X     |       |               |                 |
| <i>Greta alphasiboea</i>              | <i>Godyris duillia</i>               |       | X     |               |                 |
| <i>Greta annette championi</i>        | <i>Greta polissena umbrana</i>       |       |       | X             |                 |
| <i>Greta enigma</i> ssp               | <i>Godyris panthyale panthyale</i>   |       | X     |               |                 |
| <i>Greta enigma</i> ssp               | <i>Godyris panthyale panthyale</i>   |       | X     |               |                 |
| <i>Greta enigma</i> ssp               | <i>Greta ortygia ortygia</i>         |       |       | X             |                 |
| <i>Pteronymia alida</i> ssp           | <i>Pteronymia serrata</i> ssp        |       |       |               | X               |
| <i>Pteronymia artena</i> ssp          | <i>Oleria vicina</i>                 | X     |       |               |                 |
| <i>Pteronymia oneida oneida</i>       | <i>Pteronymia serrata</i> ssp        |       |       | X             |                 |
| <i>Pteronymia picta notilla</i>       | <i>Pteronymia latilla fulvescens</i> |       |       | X             |                 |
| <i>Pteronymia simplex simplex</i>     | <i>Episcada salvinia opleri</i>      |       | X     |               |                 |
| <i>Pteronymia</i> sp                  | <i>Pteronymia serrata</i> ssp        |       |       |               | X               |
